# Supplementary material for: Discovery of Small-Molecule Modulators of the Human Y4 Receptor
Source: PubMed Central journal article supplement (PMC4905667; doi:10.1371/journal.pone.0157146), 2016-06-13
Supplement: pone.0157146.s004.pdf [file pone.0157146.s004.pdf]

**Supporting Information Table S1** Substructure search: Niclosamide analogues and results.

| Backbone Modification      | Search Structure                                                                    | Tanimoto Cutoff | Total Compounds |
|----------------------------|-------------------------------------------------------------------------------------|-----------------|-----------------|
| None                       | 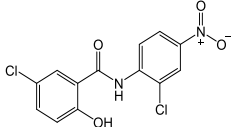   | 0.63            | 380             |
| Urea                       |    | 0.50            | 144             |
| Thiourea                   |    | 0.45            | 396             |
| $\delta$ -lactam           |    | 0.57            | 324             |
| Methylene extension<br>(a) |  | 0.57            | 232             |
| Methylene extension<br>(b) |  | 0.60            | 183             |
